# Supplementary material for: Salivary IL-17A, IL-17F, and TNF-α Are Associated with Disease Advancement in Patients with Oral and Oropharyngeal Cancer
Source: PubMed Central journal article supplement (PMC7443019; doi:10.1155/2020/3928504), 2020-08-13
Supplement: 3928504.f1.pdf [file 3928504.f1.pdf]

406 Supplementary Table I. Analysis of TNF- $\alpha$ , IL-17A, IL-17E, IL-17F concentrations  
 407 according to disease stage.

|                          |      | Median | Min  | Max    | p<br>Kruskal-Wallis<br>ANOVA |
|--------------------------|------|--------|------|--------|------------------------------|
| IL-17A<br>(pg/ml)        | I-II | 0.00   | 0.00 | 3.30   | <0.001                       |
|                          | III  | 2.02   | 0.00 | 5.69   |                              |
|                          | IV   | 15.11  | 0.00 | 98.85  |                              |
| IL-17E<br>(ng/ml)        | I-II | 0.07   | 0.00 | 0.09   | 0.25                         |
|                          | III  | 0.07   | 0.00 | 0.07   |                              |
|                          | IV   | 0.075  | 0.00 | 0.08   |                              |
| IL 17F<br>(ng/ml)        | I-II | 0.006  | 0.00 | 0.01   | <0.01                        |
|                          | III  | 0.009  | 0.01 | 0.05   |                              |
|                          | IV   | 0.012  | 0.00 | 0.08   |                              |
| TNF- $\alpha$<br>(pg/ml) | I-II | 14.65  | 0.00 | 49.47  | <0.01                        |
|                          | III  | 36.35  | 6.53 | 198.67 |                              |
|                          | IV   | 55.62  | 5.48 | 672.07 |                              |

408

409 Supplementary Table II. Statistically significant relationships between cytokine levels and T  
 410 (size or direct extent of the primary tumor) parameter.

|  |       | Median | Min  | Max   | p<br>Kruskal-Wallis<br>ANOVA |
|--|-------|--------|------|-------|------------------------------|
|  | T1-T2 | 1.00   | 0.00 | 12.42 | <0.001                       |

|                          |       |       |      |        |       |
|--------------------------|-------|-------|------|--------|-------|
| IL-17A<br>(pg/ml)        | T3    | 2.62  | 0.00 | 5.23   | <0.05 |
|                          | T4    | 18.30 | 0.00 | 98.85  |       |
| TNF- $\alpha$<br>(pg/ml) | T1-T2 | 29.24 | 0.00 | 198.67 |       |
|                          | T3    | 33.39 | 7.95 | 96.09  |       |
|                          | T4    | 66.84 | 0.00 | 672.07 |       |

411

412

413 Supplementary Table III. Statistically significant relationships between cytokine levels and N

414 (degree of spread to regional lymph nodes) parameter.

|                          |       | Median | Min   | Max    | P<br>Kruskal-Wallis<br>ANOVA |
|--------------------------|-------|--------|-------|--------|------------------------------|
| IL-17A<br>(pg/ml)        | N0    | 1.41   | 0.00  | 61.44  | <0.01                        |
|                          | N1    | 0.00   | 0.00  | 5.69   |                              |
|                          | N2-N3 | 11.10  | 0.00  | 98.85  |                              |
| IL 17F<br>(ng/ml)        | N0    | 0.007  | 0.00  | 0.05   | <0.05                        |
|                          | N1    | 0.015  | 0.005 | 0.02   |                              |
|                          | N2-N3 | 0.012  | 0.00  | 0.08   |                              |
| TNF- $\alpha$<br>(pg/ml) | N0    | 29.81  | 0.00  | 385.18 | <0.05                        |
|                          | N1    | 92.77  | 42.01 | 240.13 |                              |
|                          | N2-N3 | 40.04  | 0.00  | 672.07 |                              |

415

416 Supplementary Table IV. Relationship between the levels of cytokines tested and the results

417 of bacteriological cultures from the oral cavity. (1) Aerobic culture, (2) Anaerobic culture,

418 (+) positive, (-) negative.

|                          |   |   | Median | Min   | Max     | p    |
|--------------------------|---|---|--------|-------|---------|------|
| IL-17A<br>(pg/ml)        | 1 | + | 5.69   | 0.00  | 48.60   | 0.01 |
|                          |   | - | 20.40  | 0.71  | 98.85   |      |
|                          | 2 | + | 15.91  | 0.71  | 98.85   | 0.35 |
|                          |   | - | 13.25  | 0.00  | 55.60   |      |
| IL-17E<br>(ng/ml)        | 1 | + | 0.07   | 0.00  | 0.10    | 0.67 |
|                          |   | - | 0.07   | 0.00  | 0.08    |      |
|                          | 2 | + | 0.07   | 0.07  | 0.08    | 0.31 |
|                          |   | - | 0.07   | 0.00  | 0.10    |      |
| IL 17F<br>(ng/ml)        | 1 | + | 0.01   | 0.00  | 0.10    | 0.93 |
|                          |   | - | 0.01   | 0.00  | 0.06    |      |
|                          | 2 | + | 0.01   | 0.00  | 0.02    | 0.06 |
|                          |   | - | 0.01   | 0.00  | 0.10    |      |
| TNF- $\alpha$<br>(pg/ml) | 1 | + | 121.77 | 10.92 | 1179.80 | 0.04 |
|                          |   | - | 50.09  | 0.00  | 263.49  |      |
|                          | 2 | + | 27.86  | 0.00  | 1179.76 | 0.42 |
|                          |   | - | 64.92  | 0.28  | 372.70  |      |

422 Supplementary Table V. Correlations between salivary concentration of examined cytokines.

423

| All patients      |                   |                   |                                |                                |
|-------------------|-------------------|-------------------|--------------------------------|--------------------------------|
|                   | IL-17A<br>(pg/ml) | IL-17E<br>(ng/ml) | IL 17F<br>(ng/ml)              | TNF- $\alpha$<br>(pg/ml)       |
| IL-17A<br>(pg/ml) | -                 | R=0.17<br>NS      | <b>R=0.29</b><br><b>p=0.03</b> | R=0.17<br>NS                   |
| IL-17E<br>(ng/ml) | -                 | -                 | R=-0.15<br>NS                  | R=-0.05<br>NS                  |
| IL 17F<br>(ng/ml) | -                 | -                 | -                              | R=-0.007<br>NS                 |
| Stage I+II        |                   |                   |                                |                                |
| IL-17A<br>(pg/ml) | -                 | R=-0.03<br>NS     | R=0.36<br>NS                   | <b>R=0.67</b><br><b>p=0.02</b> |
| IL-17E<br>(ng/ml) | -                 | -                 | R=-0.48<br>NS                  | R=0.09<br>NS                   |
| IL 17F<br>(ng/ml) | -                 | -                 | -                              | R=-0.14<br>NS                  |
| Stage III         |                   |                   |                                |                                |

|                   |   |               |               |               |
|-------------------|---|---------------|---------------|---------------|
| IL-17A<br>(pg/ml) | - | R=-0.10<br>NS | R=0.15<br>NS  | R=-0.22<br>NS |
| IL-17E<br>(ng/ml) | - | -             | R=-0.07<br>NS | R=-0.19<br>NS |
| IL 17F<br>(ng/ml) | - | -             | -             | R=-0.04<br>NS |
| Stage IV          |   |               |               |               |
| IL-17A<br>(pg/ml) | - | R=0.04<br>NS  | R=-0.07<br>NS | R=0.05<br>NS  |
| IL-17E<br>(ng/ml) | - | -             | R=-0.20<br>NS | R=-0.11<br>NS |
| IL 17F<br>(ng/ml) | - | -             | -             | R=0.01<br>NS  |

424

425
